# Supplementary material
Source: PubMed Central journal article supplement (PMC4808776)

## Supplement

Title: The Effects of Apolipoprotein B Depletion on HDL Subspecies Composition and Function

Running Title: ApoB Depletion

Authors: W. Sean Davidson PhD<sup>1</sup>, Anna Heink MS<sup>2</sup>, Hannah Sexmith<sup>2</sup>, John T Melchior PhD<sup>1</sup>, Scott M Gordon PhD<sup>3</sup>, Zsuzsanna Kuklenyik<sup>4</sup>, Laura Woolett PhD<sup>1</sup>, John R Barr PhD<sup>4</sup>, Jeffrey I Jones BS<sup>4</sup>, Christopher A Toth MS<sup>5</sup>, Amy S Shah MD MS<sup>2</sup>

<sup>1</sup>Center for Lipid and Arteriosclerosis Science, Department of Pathology and Laboratory Medicine, University of Cincinnati, 2120 East Galbraith Road, Cincinnati, OH 45237-0507, USA

<sup>2</sup>Department of Pediatrics, Cincinnati Children's Hospital Research Foundation, 3333 Burnet Avenue, MLC 7012, Cincinnati, OH 45229-3039, USA

<sup>3</sup>National Heart, Lung and Blood Institute Lipoprotein Metabolism Section, 9000 Rockville Pike Building 10 Room 8N224 Bethesda, Maryland 20892

<sup>4</sup> Division of Laboratory Sciences, National Center for Environmental Health, Centers for Disease Control and Prevention, Atlanta, GA 30341, USA.

<sup>5</sup> Battelle Memorial Institute, Analytical Services, Atlanta, GA 30329, USA.

\*Corresponding Author/Reprints: Amy S Shah MD MS. Cincinnati Children's Hospital Medical Center, Division of Endocrinology. 3333 Burnet Ave ML 7012. Cincinnati OH 45229. Email: [amy.shah@cchmc.org](mailto:amy.shah@cchmc.org). Phone: 513-636-4744. Fax: 513-696-7486.

## **Supplemental Methods**

### **Trypsin digestion and LC-MS/MS analysis of apolipoproteins**

To a 100  $\mu$ L aliquot of each of the 40 fractions, 50  $\mu$ L Perfinity digest buffer containing 0.45% Zwittergent 3-12 (EMD Millipore, Billerica, MA, USA) was added and spiked with 5  $\mu$ L isotopically labeled target peptide mix ( $\sim$ 10 pmol/mL). The trypsin digestion coupled LC separation was performed on an on-line column switching system, Perfinity (Shimadzu Scientific Instruments/Perfinity Biosciences Inc.), equipped with a Perfinity trypsin column (2.1 x 50 mm), a trapping column and an analytical column (HALO C18 core shell 5 x 2.1 mm 2.7  $\mu$ m and 100 x 2.1 mm 2.7  $\mu$ m particle size, respectively). From each diluted and spiked fraction 50  $\mu$ L was injected on the on-line trypsin column at 25  $\mu$ L/min flow rate collecting peptide cleavage products for 8 min on the trapping column. After digestion/trapping, the cleavage products were eluted to the analytical column and separated using an acetonitrile/0.1% formic acid in water solvent gradient program (3-95% at 0-7 min, and equilibration to 3% at 7-10 min) with 350  $\mu$ L/min flow rate. The native peptide and the isotopically labeled peptide internal standard chromatograms were acquired in multiple reaction monitoring mode on a 6500 Qtrap instrument (AB Sciex, Foster City, CA, USA).

## Supplementary Figures

**Supplementary Figure 1: Overlay of phospholipid content from the triple Superdex Increase gel filtration chromatography separation of plasma (●) vs. ultracentrifugally-isolated LDL (▼) and HDL (○) from the same subject.** Fractions 15-19 contain apoB and are comprised of LDL and VLDL. Fractions 20-29 are considered to be HDL-containing fractions because they are apoA-I rich and demonstrate particle diameters which are consistent with measurements for density-isolated HDL.

**Supplementary Figure 2: Phospholipid and cholesterol distribution across lipoprotein subspecies of ultracentrifugally-isolated HDL before and after PEG apoB depletion.** 1 ml density-isolated HDL (lacking LDL/VLDL) containing 9 mg/ml protein was apoB depleted using 400 µl 20% PEG (MW 6000). The resulting supernatant was collected and fractionated via triple Superdex Increase gel filtration chromatography. Comparison of volume-adjusted HDL control fractions (●) vs. PEG apoB depleted HDL fractions (○) in terms of a) phospholipid and b) cholesterol distribution.

Supplementary Figure I:

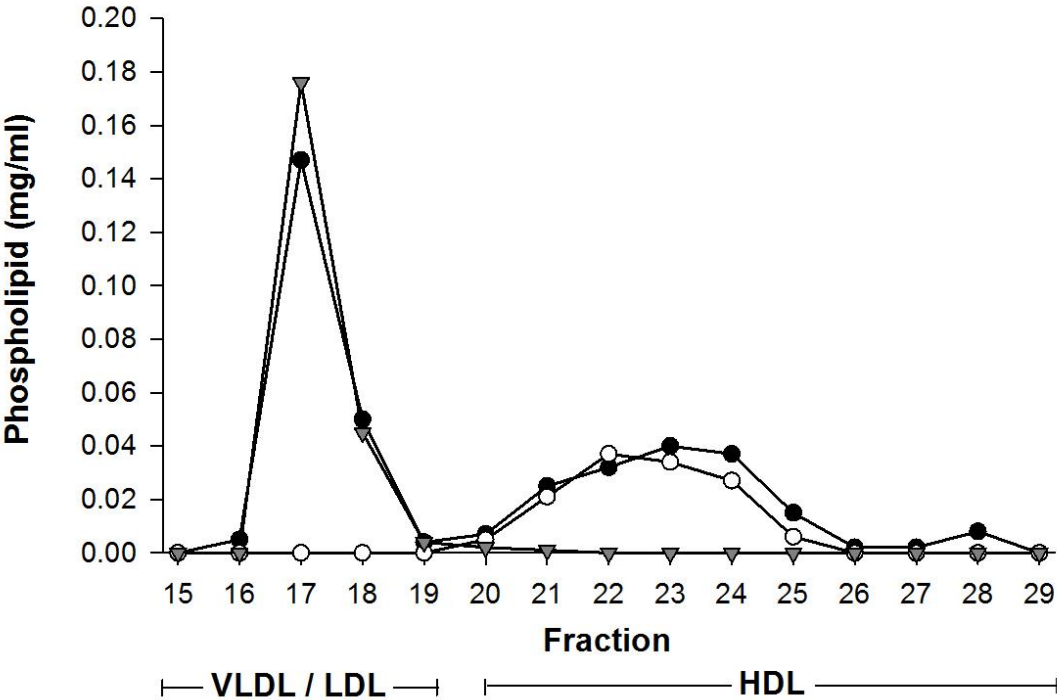

Supplementary Figure II:

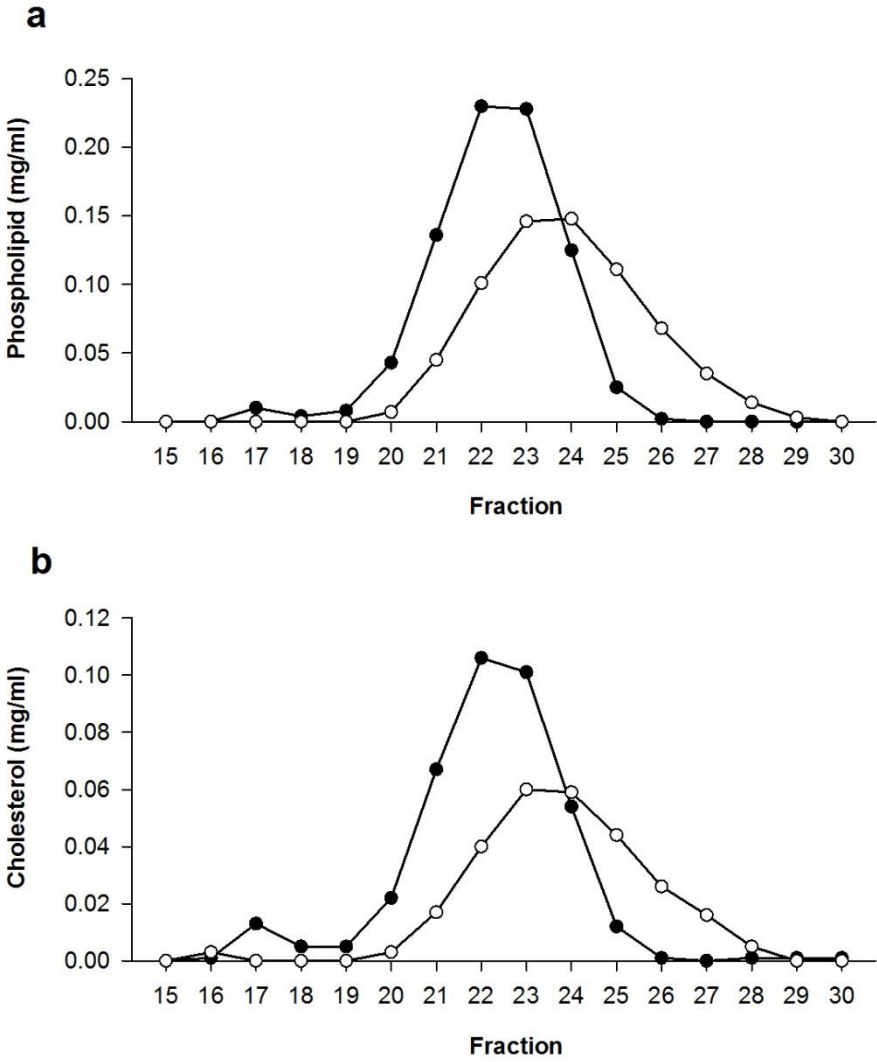

Supplement: 10.1194_M066613_jlr.M066613-1.pdf [file 10.1194_M066613_jlr.M066613-1.pdf]
